# Supplementary material for: Parallel motif triplex formation via a new, bi-directional hydrogen bonding pattern incorporating a synthetic cyanuryl nucleoside into the sense chain
Source: Royal Society of Chemistry journal article supplement (doi:10.1039/d0ra03889j), 2020-01-01
Supplement: d0ra03889j1.pdf [file d0ra03889j1.pdf]

## ***Electronic Supplementary Information (ESI)***

### **Parallel-motif triplex formation via a new, bi-directional hydrogen bonding pattern incorporating a synthetic cyanuryl nucleoside into the sense chain**

**Akihiko Hatano,<sup>a\*</sup> Kei Shimazaki,<sup>a</sup> Maina Otsu,<sup>b</sup> Gota Kawai<sup>b</sup>**

<sup>a</sup>Department of Chemistry, Shibaura Institute of Technology, 307 Fukasaku, Minuma-ku, Saitama, 337-8570, Japan. Tel: +81-48-687-5035, Fax: +81-48-687-5013; Email: a-hatano@sic.shibaura-it.ac.jp

<sup>b</sup>Department of Life and Environmental Sciences, Faculty of Engineering, Chiba Institute of Technology, 2-17-1 Tsudanuma, Narashino, Chiba 275-0016, Japan.

#### **S1.** NMR data for the synthetic compounds

|      |                    |
|------|--------------------|
| S1-1 | Compound <b>2</b>  |
| S1-2 | Compound <b>4</b>  |
| S1-3 | Compound <b>5</b>  |
| S1-4 | Compound <b>6</b>  |
| S1-5 | Compound <b>7b</b> |
| S1-6 | Compound <b>7a</b> |
| S1-7 | Compound <b>8</b>  |

#### **S2.** Circular dichroism of duplex and triplex

# S1. NMR data for the synthetic compounds

|                       |                                                                                      |                                                                                                                                                                                                                                                                                                                                                                                                                                                                                                                                                                                                                                                                                                                                                                                                                                                                                                                                                                                                                                                                                                                                                                                                                                                                                                                                                                                                                                                                                                |
|-----------------------|--------------------------------------------------------------------------------------|------------------------------------------------------------------------------------------------------------------------------------------------------------------------------------------------------------------------------------------------------------------------------------------------------------------------------------------------------------------------------------------------------------------------------------------------------------------------------------------------------------------------------------------------------------------------------------------------------------------------------------------------------------------------------------------------------------------------------------------------------------------------------------------------------------------------------------------------------------------------------------------------------------------------------------------------------------------------------------------------------------------------------------------------------------------------------------------------------------------------------------------------------------------------------------------------------------------------------------------------------------------------------------------------------------------------------------------------------------------------------------------------------------------------------------------------------------------------------------------------|
| <p>S1-1</p>           | <p>Compound 2</p>                                                                    | 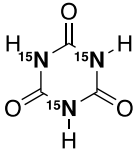 <p>in DMSO</p>                                                                                                                                                                                                                                                                                                                                                                                                                                                                                                                                                                                                                                                                                                                                                                                                                                                                                                                                                                                                                                                                                                                                                                                                                                                                                                                                                                                              |
| <p><sup>13</sup>C</p> |   |  <pre> ----- PROCESSING PARAMETERS ----- dc balance( 0, FALSE ) sexp( 2.0[Hz], 0.0[s] ) tropicacid( 0[Hz], 0[Hz], 80[Hz], 100[Hz] ) zerofill( 1 ) fft( 1, TRUE, TRUE ) machinephase ppm phase( -0.02654, 0, 74.02815[Hz] ) phase( -0.0, 0, 74.02815[Hz] ) phase( -0.0, 0, 74.02815[Hz] )  Filename = 15N-Cyanuric acid2_Carbon- Author = delta Experiment = carbon_jcp Sample_id = 15N-Cyanuric acid2 Solvent = DMSO-d6 Creation_Time = 6-AUG-2015 07:40:48 Revision_Time = 17-APR-2020 08:18:17 Current_Time = 17-APR-2020 09:38:26  Comment = single pulse decoupled gat Data_Format = 1D COMPLEX Dim_Size = 22026 Dim_Title = Carbon13 Dim_Units = [ppm] Dimensions = X Site = JNM ECS400 Spectrometer = DELTA2_NMR Field_strength = 9.389766[Hz] (400[MHz]) X_Acq_Duration = 1.0433332[s] X_Domain = 13C X_Freq = 100.52530333[MHz] X_Offset = 100[ppm] X_Points = 32768 X_Prescans = 4 X_Resolution = 0.95846665[Hz] X_Sweep = 31.40703518[kHz] X_Sweep_Clippped = 25.12562814[kHz] Irr_Domain = Proton Irr_Freq = 399.78219838[MHz] Irr_Offset = 5[ppm] Clipped = FALSE Scans = 512 Total_Scans = 512 Relaxation_Delay = 2[s] Recvr_Gain = 50 Temp_Get = 22.5[degC] X_90_Width = 8.57[us] X_Acq_Time = 1.0433332[s] X_Angle = 30[deg] X_Alt = 4.4[deg] X_Pulse = 2.8566667[us] Irr_Atn_Dec = 21.689[db] Irr_Atn_Noise = 21.689[db] Irr_Noise = WALTZ Irr_Width = 0.115[ms] Decoupling = TRUE </pre>   |
| <p><sup>13</sup>C</p> |  |  <pre> ----- PROCESSING PARAMETERS ----- dc balance( 0, FALSE ) sexp( 2.0[Hz], 0.0[s] ) tropicacid( 0[Hz], 0[Hz], 80[Hz], 100[Hz] ) zerofill( 1 ) fft( 1, TRUE, TRUE ) machinephase ppm phase( -0.02654, 0, 74.02815[Hz] ) phase( -0.0, 0, 74.02815[Hz] ) phase( -0.0, 0, 74.02815[Hz] )  Filename = 15N-Cyanuric acid2_Carbon- Author = delta Experiment = carbon_jcp Sample_id = 15N-Cyanuric acid2 Solvent = DMSO-d6 Creation_Time = 6-AUG-2015 07:40:48 Revision_Time = 17-APR-2020 08:18:17 Current_Time = 17-APR-2020 09:40:14  Comment = single pulse decoupled gat Data_Format = 1D COMPLEX Dim_Size = 22026 Dim_Title = Carbon13 Dim_Units = [ppm] Dimensions = X Site = JNM ECS400 Spectrometer = DELTA2_NMR Field_strength = 9.389766[Hz] (400[MHz]) X_Acq_Duration = 1.0433332[s] X_Domain = 13C X_Freq = 100.52530333[MHz] X_Offset = 100[ppm] X_Points = 32768 X_Prescans = 4 X_Resolution = 0.95846665[Hz] X_Sweep = 31.40703518[kHz] X_Sweep_Clippped = 25.12562814[kHz] Irr_Domain = Proton Irr_Freq = 399.78219838[MHz] Irr_Offset = 5[ppm] Clipped = FALSE Scans = 512 Total_Scans = 512 Relaxation_Delay = 2[s] Recvr_Gain = 50 Temp_Get = 22.5[degC] X_90_Width = 8.57[us] X_Acq_Time = 1.0433332[s] X_Angle = 30[deg] X_Alt = 4.4[deg] X_Pulse = 2.8566667[us] Irr_Atn_Dec = 21.689[db] Irr_Atn_Noise = 21.689[db] Irr_Noise = WALTZ Irr_Width = 0.115[ms] Decoupling = TRUE </pre> |

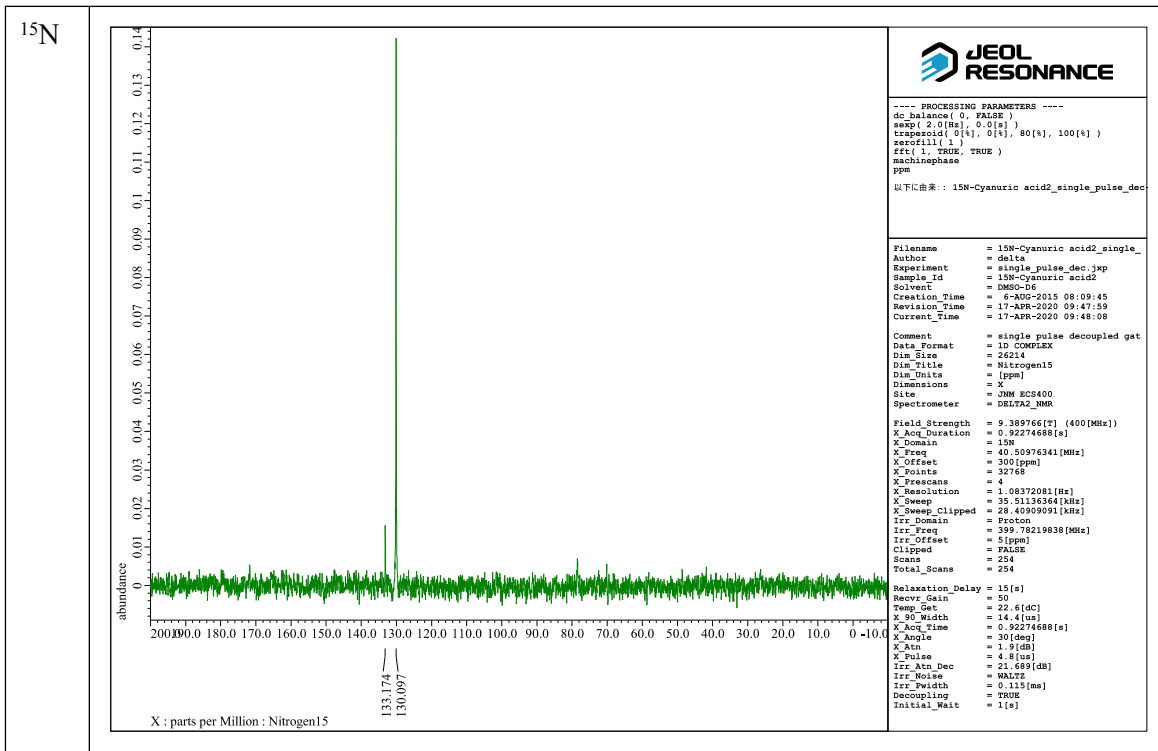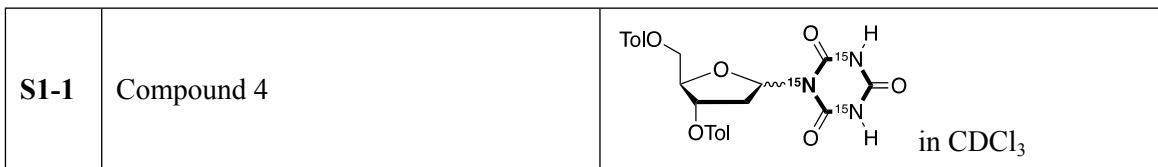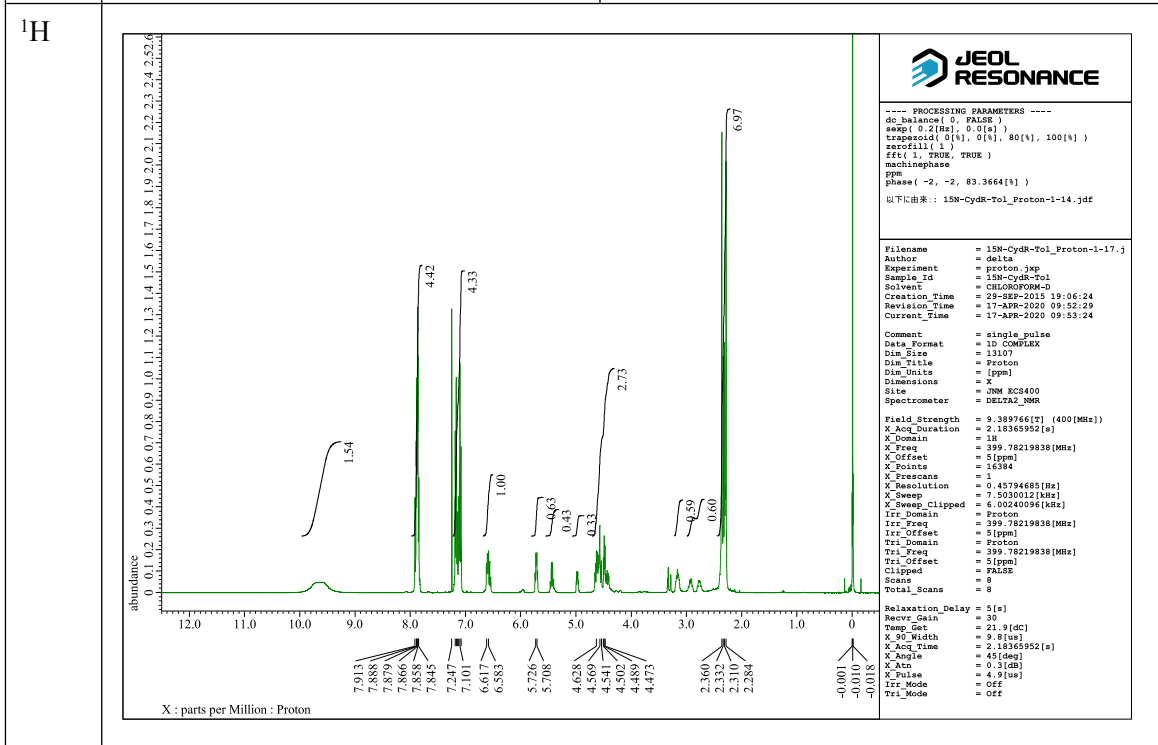

<sup>13</sup>C

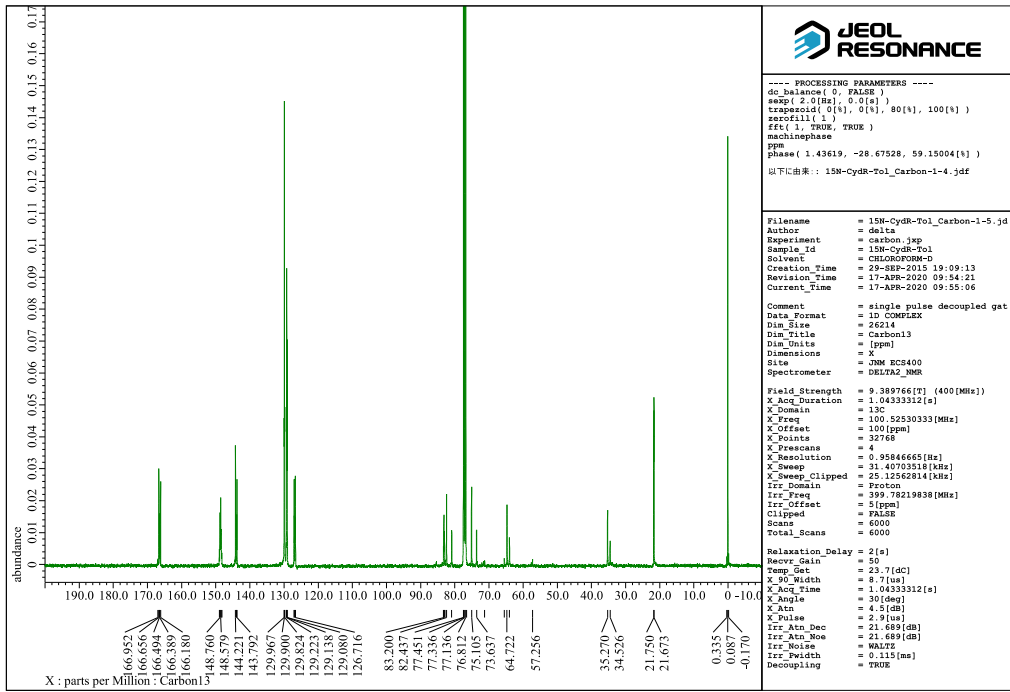

<sup>15</sup>N

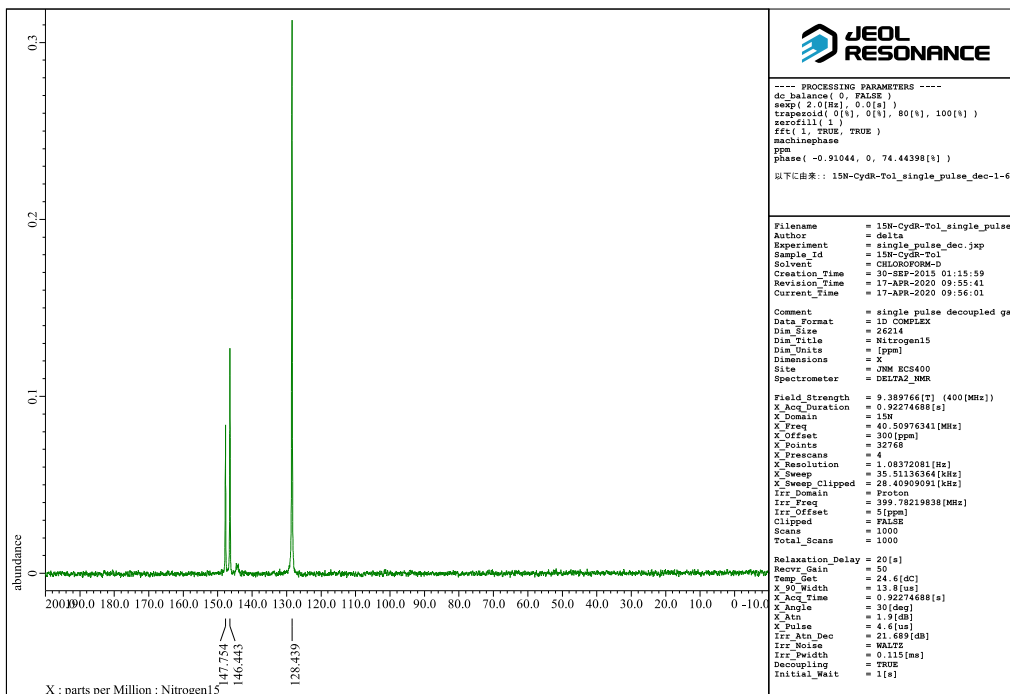

S1-3

Compound 5

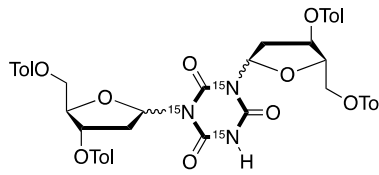

in CDCl<sub>3</sub>

<sup>1</sup>H

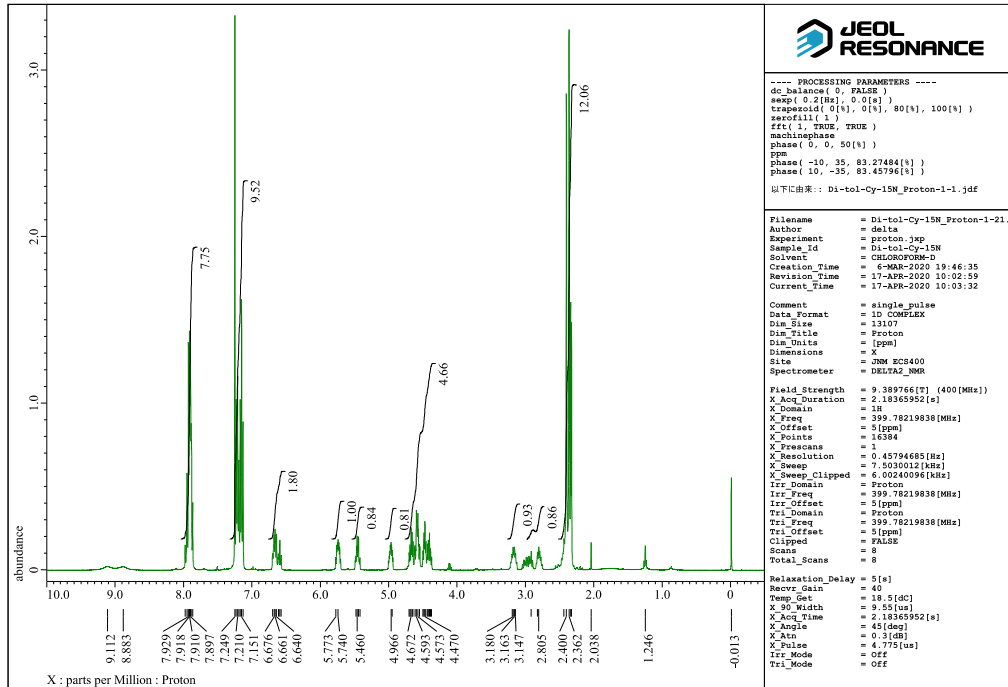

<sup>13</sup>C

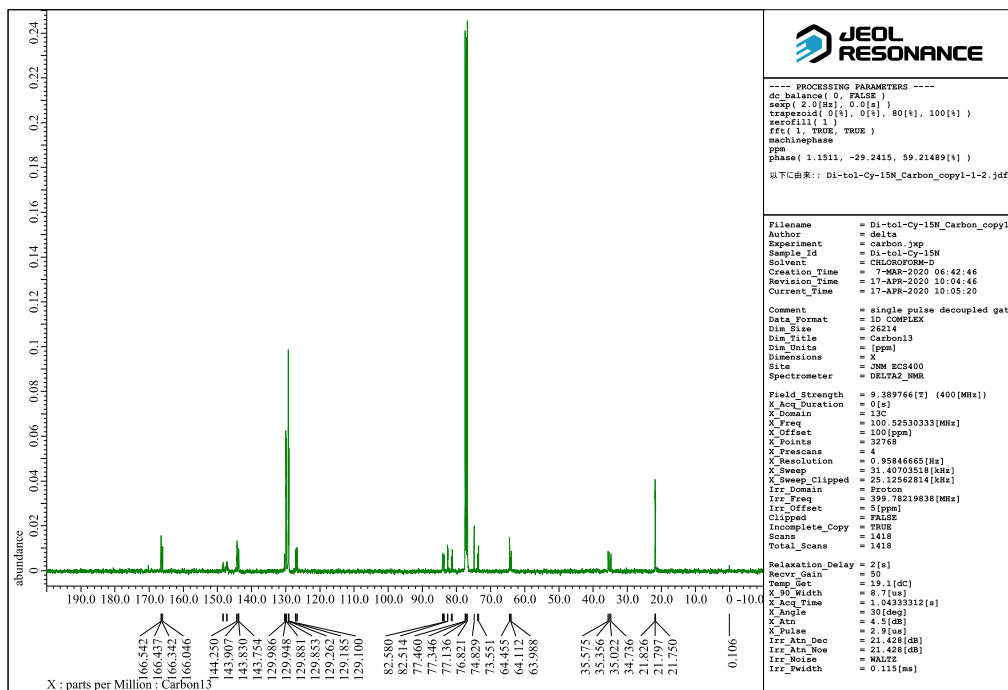

<sup>15</sup>N

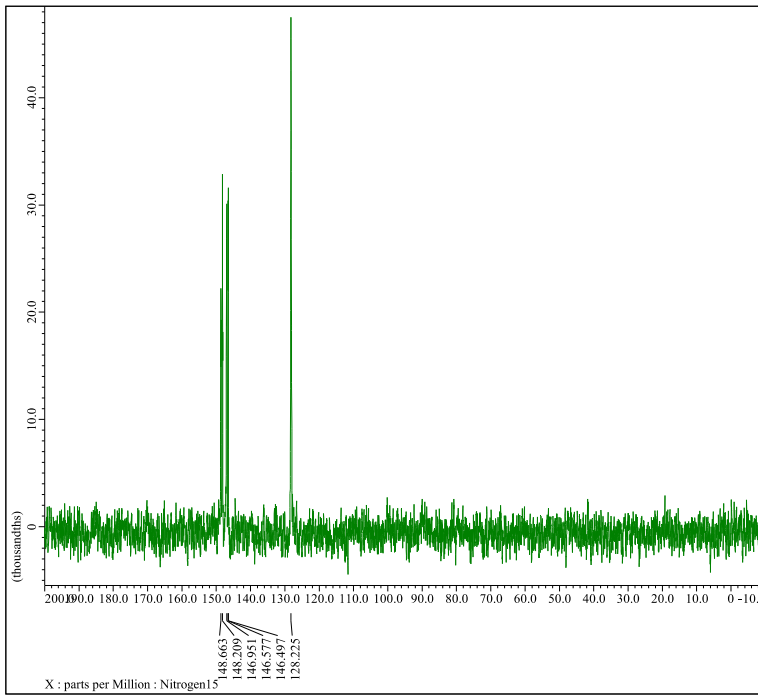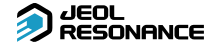

---- PROCESSING PARAMETERS ----  
dc balance( 0, FALSE )  
msp( 2.0[Hz], 0.0[s] )  
trapezoid( 0[Hz], 0[Hz], 80[Hz], 100[Hz] )  
zerofill( 1 )  
fft( 1, TRUE, TRUE )  
machinephase  
ppm  
phase( 359.37302, -279.14263, 74.50883[Hz] )  
以下に由来: Di-tol-Cy-15N\_single\_pulse\_dec-1-5.3

Filename = DI-tol-Cy-15N\_single\_pulse  
Author = delta  
Experiment = single\_pulse\_dec.jxp  
Sample\_Id = DI-tol-Cy-15N  
Solvent = CHLOROFORM-D  
Creation\_Time = 17-MAR-2020 08:27:23  
Revision\_Time = 17-APR-2020 10:05:58  
Current\_Time = 17-APR-2020 10:06:18  
Comment = single\_pulse decoupled gat  
Data\_Format = 1D\_COMPLEX  
Dim\_Size = 26214  
Dim\_Title = Nitrogen15  
Dim\_Units = [ppm]  
Dimensions = X  
Site = JNM ECS400  
Spectrometer = DELTA2\_NMR  
Field\_Strength = 9.389766[T] (400[MHz])  
X\_Acq\_Duration = 0.92274688[s]  
X\_Domain = 15N  
X\_Freq = 40.50976341[MHz]  
X\_Offset = 300[ppm]  
X\_Points = 32768  
X\_Freecans = 4  
X\_Resolution = 1.08372081[Hz]  
X\_Sweep = 35.51136364[kHz]  
X\_Sweep\_Clippped = 28.40300091[kHz]  
Irr\_Domain = Proton  
Irr\_Freq = 399.78219938[MHz]  
Irr\_Offset = 5[ppm]  
Clipped = FALSE  
Scans = 400  
Total\_Scans = 400  
Relaxation\_Delay = 15[s]  
Recvr\_Gain = 50  
Temp\_Gst = 13.9[dc]  
X\_50\_Width = 13.8[us]  
X\_Acq\_Time = 0.92274688[s]  
X\_Angle = 30[deg]  
X\_Atn = 1.9[db]  
X\_Pulse = 4.6[us]  
Irr\_Atn\_Dec = 21.428[db]  
Irr\_Noise = WALTZ  
Irr\_Pwidth = 0.115[ms]  
Decoupling = TRUE  
Initial\_wait = 1[s]

|                 |                                                                                                                                                                                                                                                                                                                                                                                                                                                                                                                                                                                                                                                                                                                                                                                                                                                                                                                                                                                                                                                                                                                                                                                                                                                                                                                                                                                                                                                                                                                                                                                                                                                                                                                                                                                                                                                                                                                                                                                                    |                                                                                                                                          |
|-----------------|----------------------------------------------------------------------------------------------------------------------------------------------------------------------------------------------------------------------------------------------------------------------------------------------------------------------------------------------------------------------------------------------------------------------------------------------------------------------------------------------------------------------------------------------------------------------------------------------------------------------------------------------------------------------------------------------------------------------------------------------------------------------------------------------------------------------------------------------------------------------------------------------------------------------------------------------------------------------------------------------------------------------------------------------------------------------------------------------------------------------------------------------------------------------------------------------------------------------------------------------------------------------------------------------------------------------------------------------------------------------------------------------------------------------------------------------------------------------------------------------------------------------------------------------------------------------------------------------------------------------------------------------------------------------------------------------------------------------------------------------------------------------------------------------------------------------------------------------------------------------------------------------------------------------------------------------------------------------------------------------------|------------------------------------------------------------------------------------------------------------------------------------------|
| S1-4            | Compound 6                                                                                                                                                                                                                                                                                                                                                                                                                                                                                                                                                                                                                                                                                                                                                                                                                                                                                                                                                                                                                                                                                                                                                                                                                                                                                                                                                                                                                                                                                                                                                                                                                                                                                                                                                                                                                                                                                                                                                                                         | 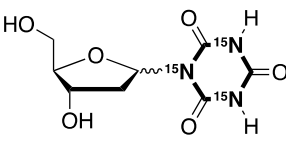 <p style="text-align: right;">in CDCl<sub>3</sub></p> |
| <sup>1</sup> H  |  <p style="text-align: center;">X: parts per Million : Proton</p> <div style="float: right; border: 1px solid black; padding: 5px; width: 60%;"> <p style="text-align: center;"><b>JEOL<br/>RESONANCE</b></p> <p>---- PROCESSING PARAMETERS ----<br/> dc_balance( 0, FALSE )<br/> sqr( 0.2[Hz], 0.0[Hz] )<br/> trapzoid( 0[Hz], 0[Hz], 80[Hz], 100[Hz] )<br/> seofilt( 1 )<br/> fft( 1, TRUE, TRUE )<br/> machinephase<br/> ppm<br/> phase( -0.04535, -1.28873, 51.50313[Hz] )<br/> 以下に由来 : 15N-Cy-OH-3_Proton-1-8.jdf</p> <hr/> <p>Filename = 15N-Cy-OH-3_Proton-1-10.jd<br/> Author = delta<br/> Experiment = proton_jmp<br/> Sample_Id = 15N-Cy-OH-3<br/> Solvent = METHANOL-D4<br/> Creation_Time = 6-OCT-2015 08:17:31<br/> Revision_Time = 17-APR-2020 10:12:23<br/> Current_Time = 17-APR-2020 10:12:31</p> <hr/> <p>Comment = single pulse<br/> Data_Format = 1D COMPLEX<br/> Dim_Size = 13107<br/> Dim_Title = Proton<br/> Dim_Units = [ppm]<br/> Dimensions = X<br/> Site = JNM ECS400<br/> Spectrometer = DELTA2_NMR</p> <hr/> <p>Field_Strength = 9.389766[T] (400[MHz])<br/> X_Acq_Duration = 2.18365952[s]<br/> X_Domain = 38<br/> X_Freq = 399.78219838[MHz]<br/> X_Offset = 5[ppm]<br/> X_Points = 14384<br/> X_Prescans = 1<br/> X_Resolution = 0.45784605[Hz]<br/> X_Sweep = 7.5030012[kHz]<br/> X_Sweep_Clippped = 6.00240096[kHz]<br/> Irr_Domain = Proton<br/> Irr_Freq = 399.78219838[MHz]<br/> Irr_Offset = 5[ppm]<br/> Tri_Domain = Proton<br/> Tri_Freq = 399.78219838[MHz]<br/> Tri_Offset = 5[ppm]<br/> Clipped = FALSE<br/> Scans = 8<br/> Total_Scans = 8</p> <hr/> <p>Relaxation_Delay = 5[s]<br/> Recvr_Gain = 46<br/> Temp_Gat = 30[dc]<br/> X_S0_Width = 9.8[us]<br/> X_Acq_Time = 2.18365952[s]<br/> X_Angle = 45[deg]<br/> X_Atn = 0.3[db]<br/> X_Pulse = 4.9[us]<br/> Irr_Mode = Off<br/> Tri_Mode = Off</p> </div>                                                         |                                                                                                                                          |
| <sup>13</sup> C |  <p style="text-align: center;">X: parts per Million : Carbon13</p> <div style="float: right; border: 1px solid black; padding: 5px; width: 60%;"> <p style="text-align: center;"><b>JEOL<br/>RESONANCE</b></p> <p>---- PROCESSING PARAMETERS ----<br/> dc_balance( 0, FALSE )<br/> sqr( 2.0[Hz], 0.0[Hz] )<br/> trapzoid( 0[Hz], 0[Hz], 80[Hz], 100[Hz] )<br/> seofilt( 1 )<br/> fft( 1, TRUE, TRUE )<br/> machinephase<br/> ppm<br/> phase( 0.02305, -199.64116, 70.84271[Hz] )<br/> 以下に由来 : 15N-Cy-dR-OH_Carbon-1-9.jdf</p> <hr/> <p>Filename = 15N-Cy-dR-OH_Carbon-1-15.j<br/> Author = delta<br/> Experiment = carbon_jmp<br/> Sample_Id = 15N-Cy-dR-OH<br/> Solvent = METHANOL-D4<br/> Creation_Time = 15-SEP-2015 18:42:39<br/> Revision_Time = 17-APR-2020 10:15:11<br/> Current_Time = 17-APR-2020 10:15:15</p> <hr/> <p>Comment = single pulse decoupled gat<br/> Data_Format = 1D COMPLEX<br/> Dim_Size = 26214<br/> Dim_Title = Carbon13<br/> Dim_Units = [ppm]<br/> Dimensions = X<br/> Site = JNM ECS400<br/> Spectrometer = DELTA2_NMR</p> <hr/> <p>Field_Strength = 9.389766[T] (400[MHz])<br/> X_Acq_Duration = 1.04333312[s]<br/> X_Domain = 130<br/> X_Freq = 100.52530333[MHz]<br/> X_Offset = 100[ppm]<br/> X_Points = 32768<br/> X_Prescans = 4<br/> X_Resolution = 0.95846605[Hz]<br/> X_Sweep = 31.40703518[kHz]<br/> X_Sweep_Clippped = 25.12362814[kHz]<br/> Irr_Domain = Proton<br/> Irr_Freq = 399.78219838[MHz]<br/> Irr_Offset = 5[ppm]<br/> Clipped = FALSE<br/> Scans = 6000<br/> Total_Scans = 6000</p> <hr/> <p>Relaxation_Delay = 2[s]<br/> Recvr_Gain = 50<br/> Temp_Gat = 50.1[dc]<br/> X_S0_Width = 8.57[us]<br/> X_Acq_Time = 1.04333312[s]<br/> X_Angle = 30[deg]<br/> X_Atn = 4.5[db]<br/> X_Pulse = 8.8546667[us]<br/> Irr_Atn_Dec = 21.689[db]<br/> Irr_Atn_Noise = 21.689[db]<br/> Irr_Noise = WALL2<br/> Irr_Pwidth = 0.115[ms]<br/> decoupling = TRUE</p> </div> |                                                                                                                                          |

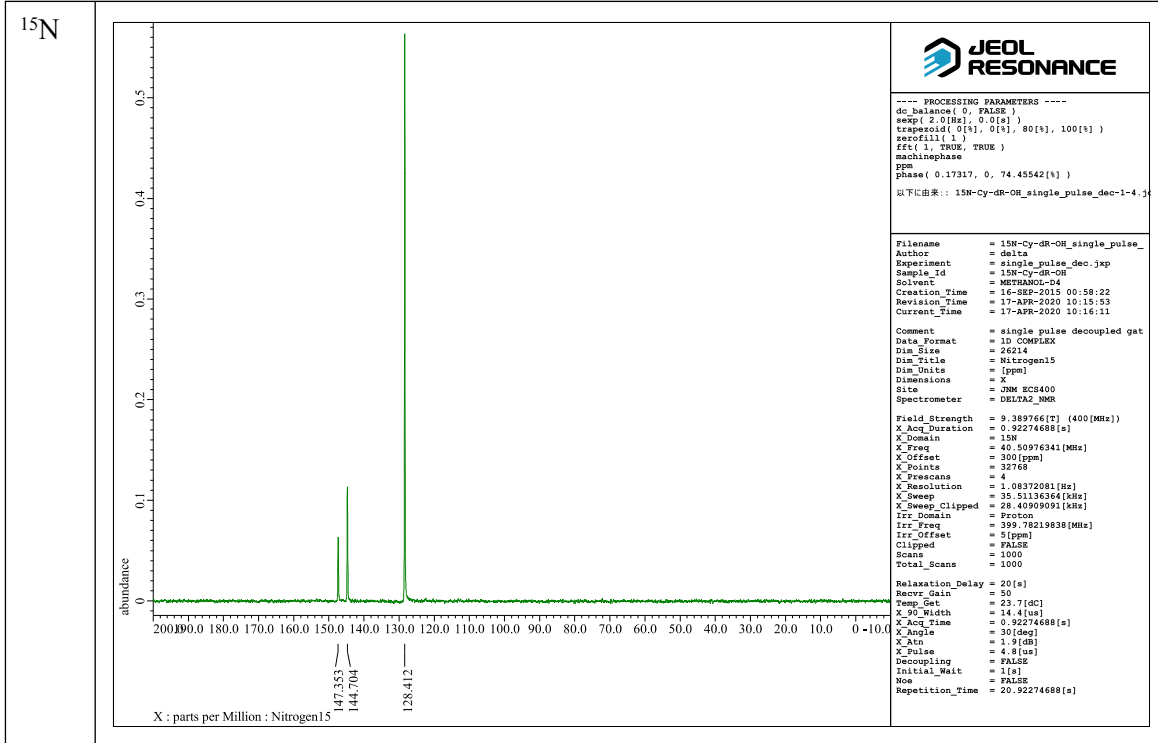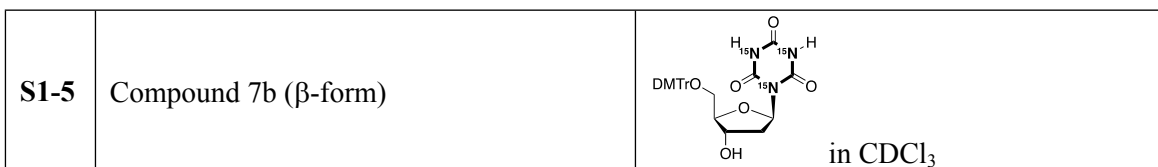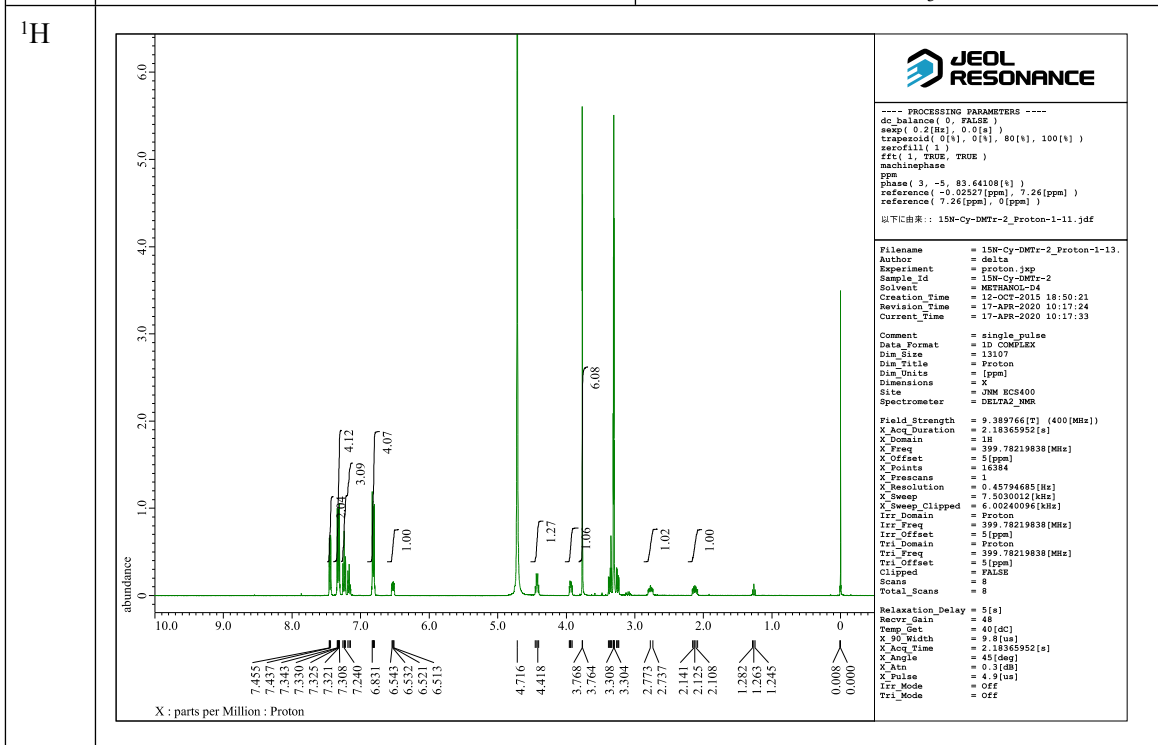



<sup>13</sup>C

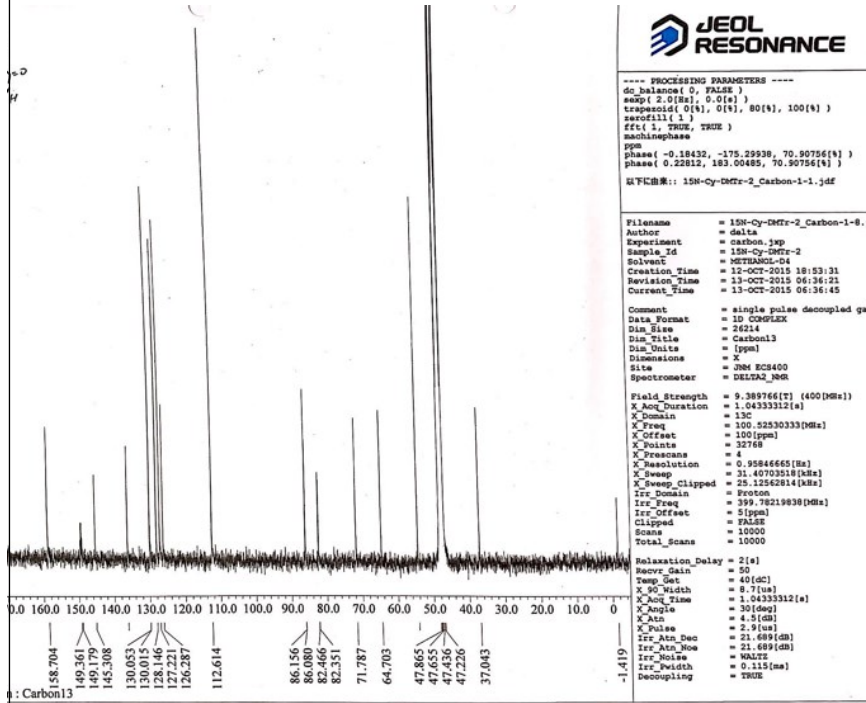

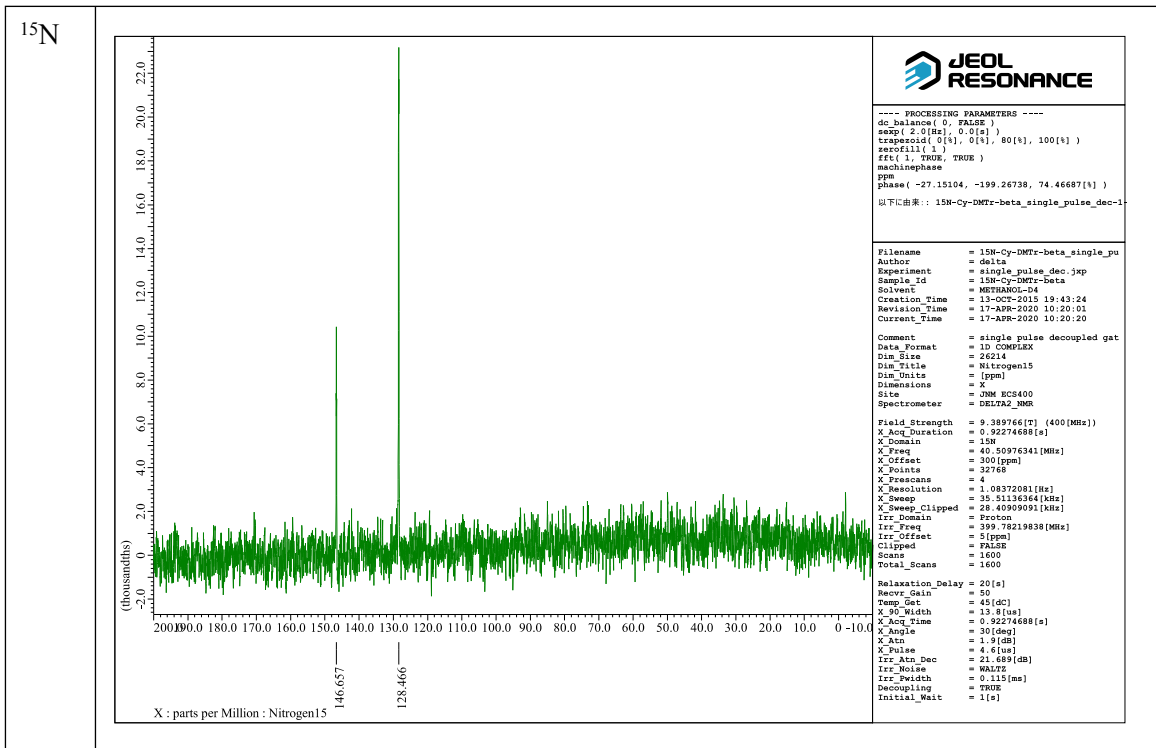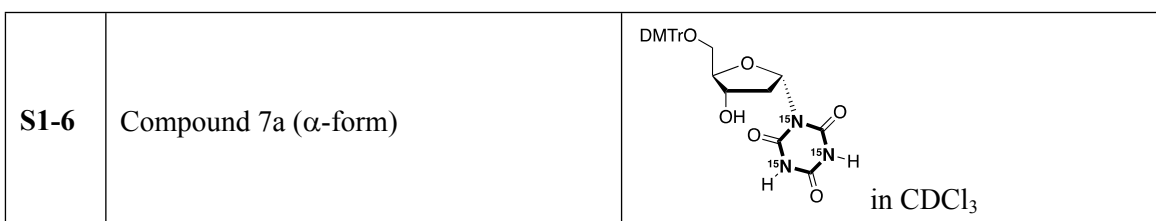

<sup>1</sup>H

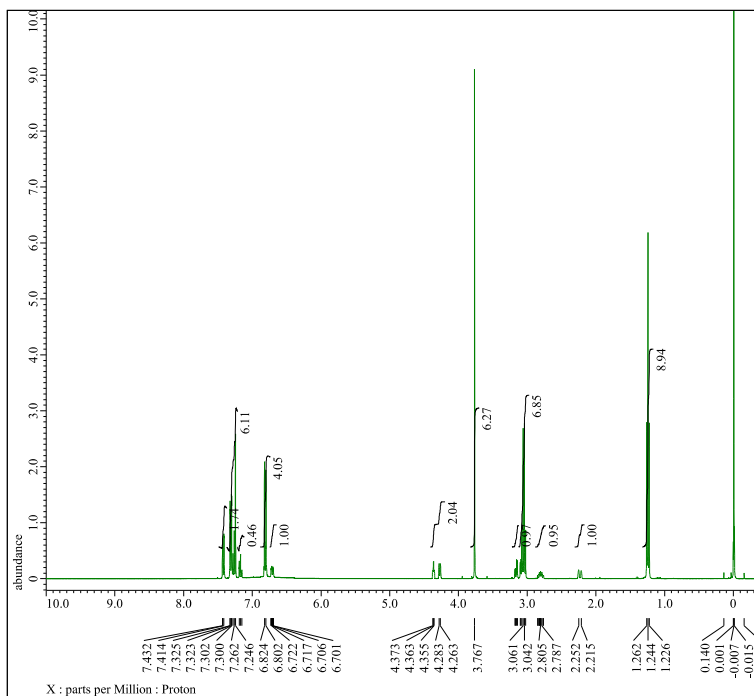

X : parts per Million : Proton

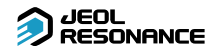

--- PROCESSING PARAMETERS ---  
dg\_balance(C, FALSE)  
sExp( 0.2 [Hz], 0.0 [s])  
trapezoid( 0 [s], 0 [s], 80 [s], 100 [s])  
zerofill( 1 )  
fft( 1, TRUE, TRUE )  
machinephase  
ppm  
Phase( 1, -0.00033, 83.35114 [°] )  
以下に由来: 15N-Cy-DMTr-alpha\_Proton-1-12.jdf

Filename = 15N-Cy-DMTr-alpha\_Proton-1  
Author = delta  
Experiment = proton\_jmp  
Sample\_Id = 15N-Cy-DMTr-alpha  
Solvent = CHLOROFORM-D  
Creation\_Time = 14-OCT-2013 06:47:58  
Revision\_Time = 17-APR-2020 10:23:29  
Current\_Time = 17-APR-2020 10:23:37  
Comment = single pulse  
Data\_Format = 1D COMPLEX  
Dim\_Size = 13107  
Dim\_Title = Proton  
Dim\_Units = [ppm]  
Dimensions = X  
Spectrometer = JNM ECS400  
Site = DELTA2\_NMR  
Field\_Strength = 9.389766 [T] (400 [MHz])  
X\_Acq\_Duration = 2.18365952 [s]  
X\_Domain = 1H  
X\_Freq = 399.78219838 [MHz]  
X\_Offset = 5 [ppm]  
X\_Points = 16384  
X\_Frequence = 1  
X\_Resolution = 0.45794685 [Hz]  
X\_Sweep = 7.5030012 [kHz]  
X\_Sweep\_Clippped = 6.00240096 [kHz]  
Irr\_Domain = Proton  
Irr\_Freq = 399.78219838 [MHz]  
Irr\_Offset = 5 [ppm]  
Tri\_Domain = Proton  
Tri\_Freq = 399.78219838 [MHz]  
Tri\_Offset = 5 [ppm]  
Clipped = FALSE  
Scans = 8  
Total\_Scans = 8  
Relaxation\_Delay = 5 [s]  
Recvr\_Gain = 38  
Temp\_Get = 45 [dC]  
X\_90\_Width = 9.8 [us]  
X\_Acq\_Time = 2.18365952 [s]  
X\_Angle = 45 [deg]  
X\_P1 = 0.2 [us]  
X\_Pulse = 4.9 [us]  
Irr\_Mode = Off  
Tri\_Mode = Off

<sup>13</sup>C

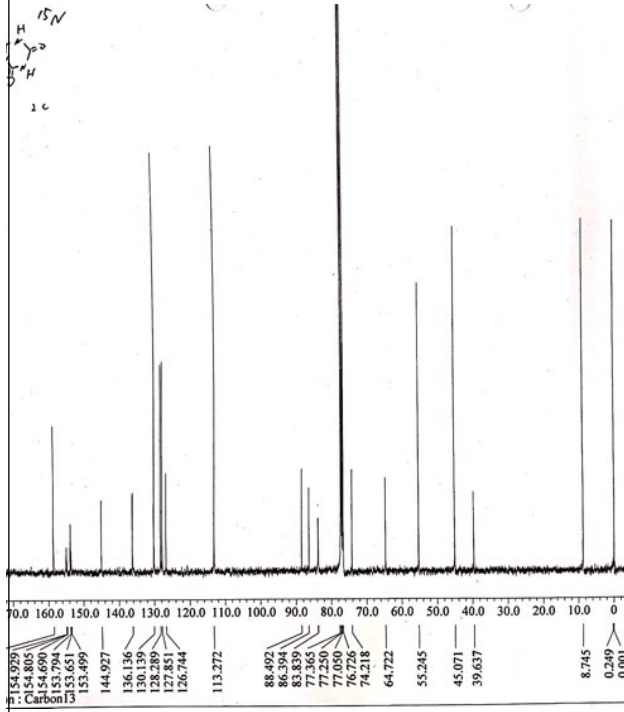

| Chemical Shift (ppm) |
|----------------------|
| 154.959              |
| 154.805              |
| 154.690              |
| 153.794              |
| 153.651              |
| 153.499              |
| 144.927              |
| 136.136              |
| 132.789              |
| 127.851              |
| 126.744              |
| 113.272              |
| 88.492               |
| 86.392               |
| 83.839               |
| 77.365               |
| 77.250               |
| 77.050               |
| 76.726               |
| 74.218               |
| 64.722               |
| 55.245               |
| 45.071               |
| 39.637               |
| 8.745                |
| 0.249                |
| 0.001                |

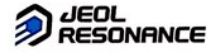

```
----- PROCESSING PARAMETERS -----
dc_balance( 0, FALSE )
snp( 2.018s, 0.01s )
trapezoid( 0%, 0%, 80%, 100% )
sinc( 1, 1 )
fft( 1, TRUE, TRUE )
magnifyphase
ppm
phase( -1.12616, 0, 89.89051(%) )
以下信息: 15N-Cy-DNtr-alpha_Carbon-1-1.jdf

Filename      = 15N-Cy-DNtr-alpha_Carbon-1
Author        = delta
Experiment    = carbon.jxp
Sample_Id     = 15N-Cy-DNtr-alpha
Solvent       = CDCl3/DMSO-d
Creation_Time = 14-OCT-2015 06:52:17
Revision_Time = 14-OCT-2015 09:08:19
Current_Time  = 14-OCT-2015 09:08:52

Comment       = single pulse decoupled gat
Data_Format   = 1D CPMGLEX
Dir_Site      = 26214
Dir_Title     = Carbon13
Dir_Units     = [ppm]
Dimensions    = X
Site          = JNM ECX400
Spectrometer  = DELTAJ_90K

Field_Strength = 9.397766 [T] (400 [MHz])
X_Acq_Duration = 1.0433312 [s]
X_Domain       = 13C
X_Freq         = 100.6253033 [MHz]
X_Offset       = 100 [ppm]
X_Points       = 32768
X_Fscans       = 4
X_Resolution   = 0.95846665 [Hz]
X_Sweep        = 31.40703518 [kHz]
X_Sweep_Clipped = 21.12560814 [kHz]
Irr_Domain     = Proton
Irr_Freq       = 399.78219838 [MHz]
Irr_Offset     = 5 [ppm]
Clipped        = FALSE
Scans          = 2000
Total_Scans    = 2000

Relaxation_Delay = 2 [s]
Recov_Gain       = 50
Temp_Gat         = 45 [dC]
X_90_Width       = 8.7 [us]
X_Acq_Time       = 1.0433312 [s]
X_Angle          = 30 [deg]
X_Pulse          = 4.5 [dB]
X_Pulse_Prog    = 2.9 [us]
Irr_Atn_Dec     = 21.689 [dB]
Irr_Atn_Noise   = 21.689 [dB]
WALTZ           = WALTZ
Irr_Width       = 0.115 [ms]
Decoupling      = TRUE
```

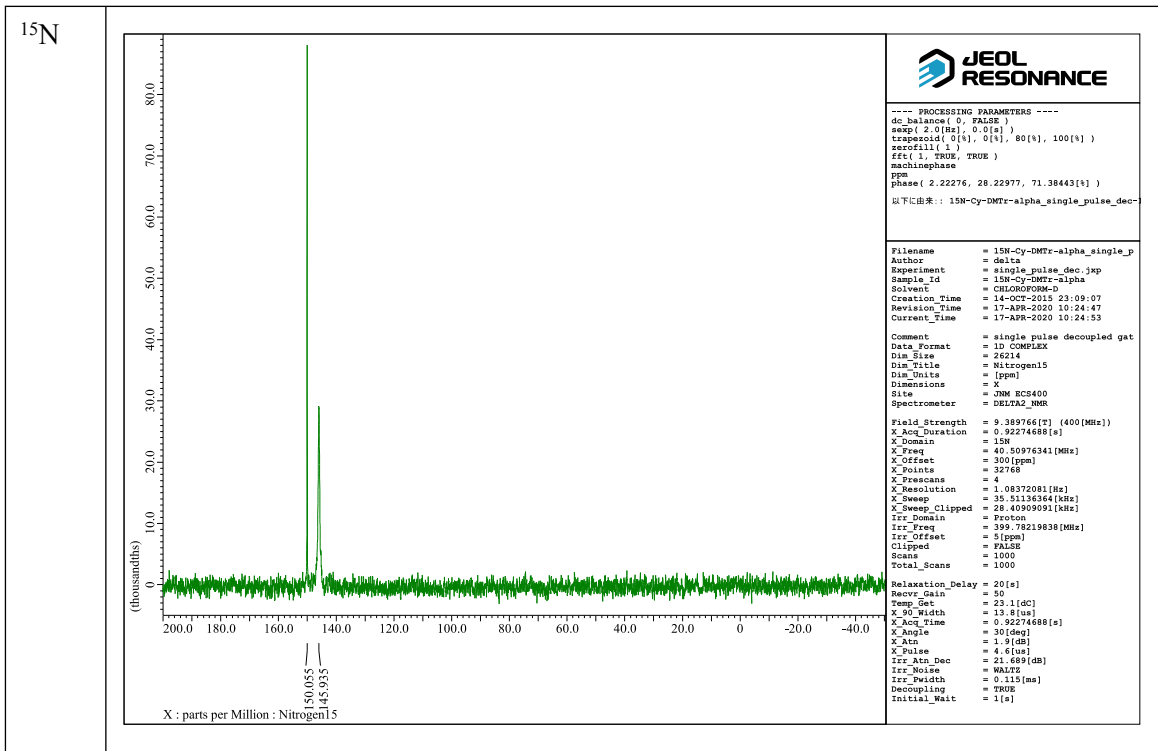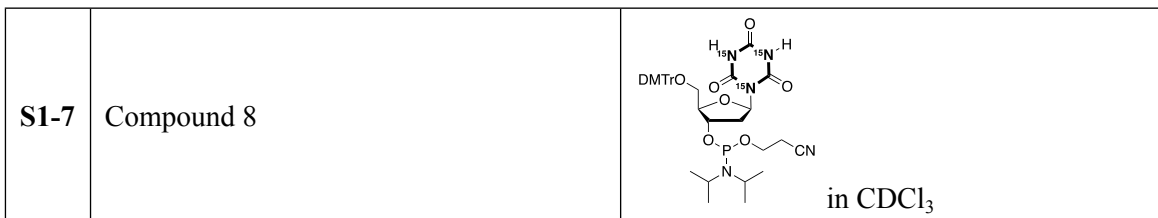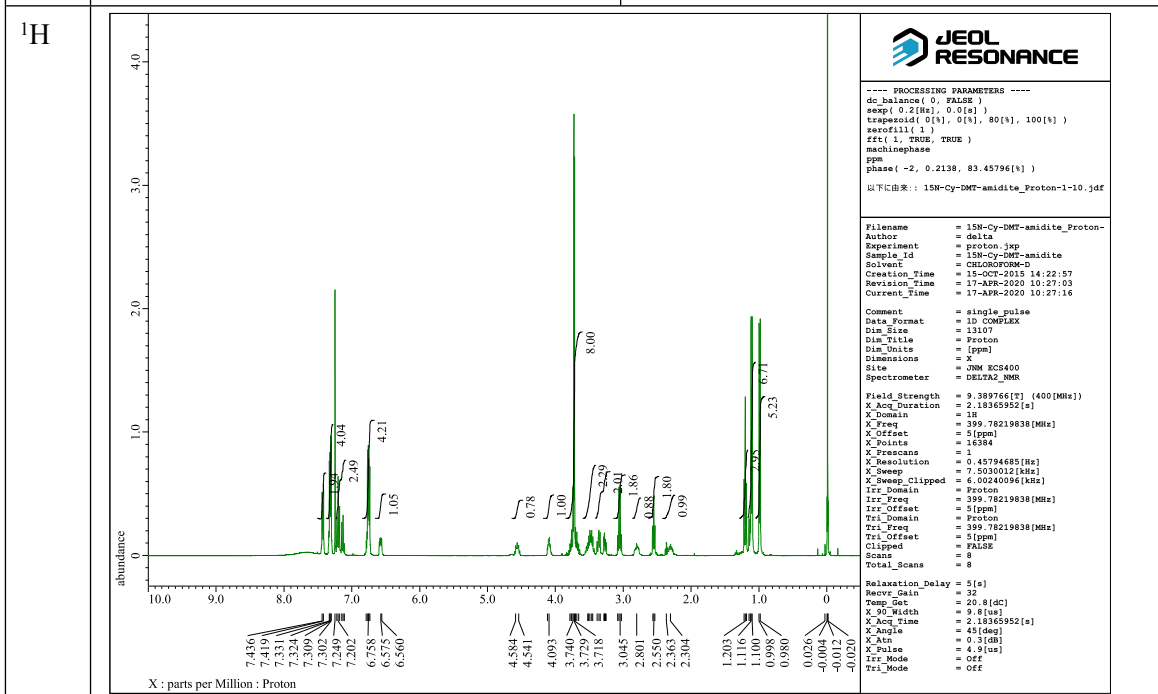

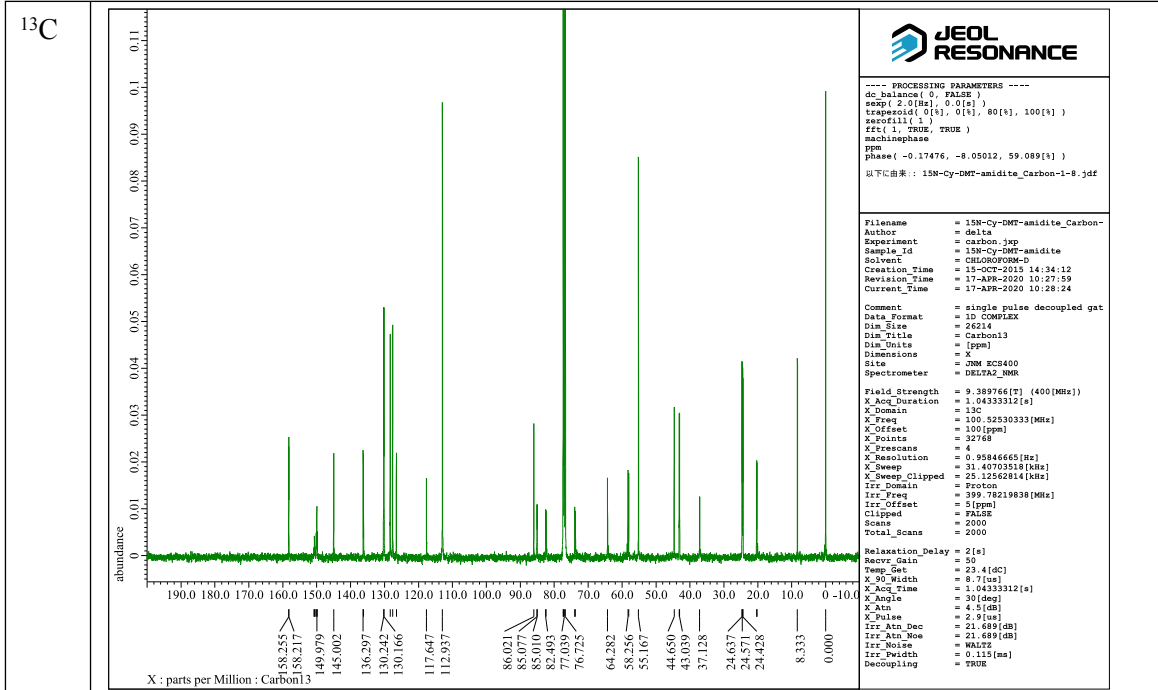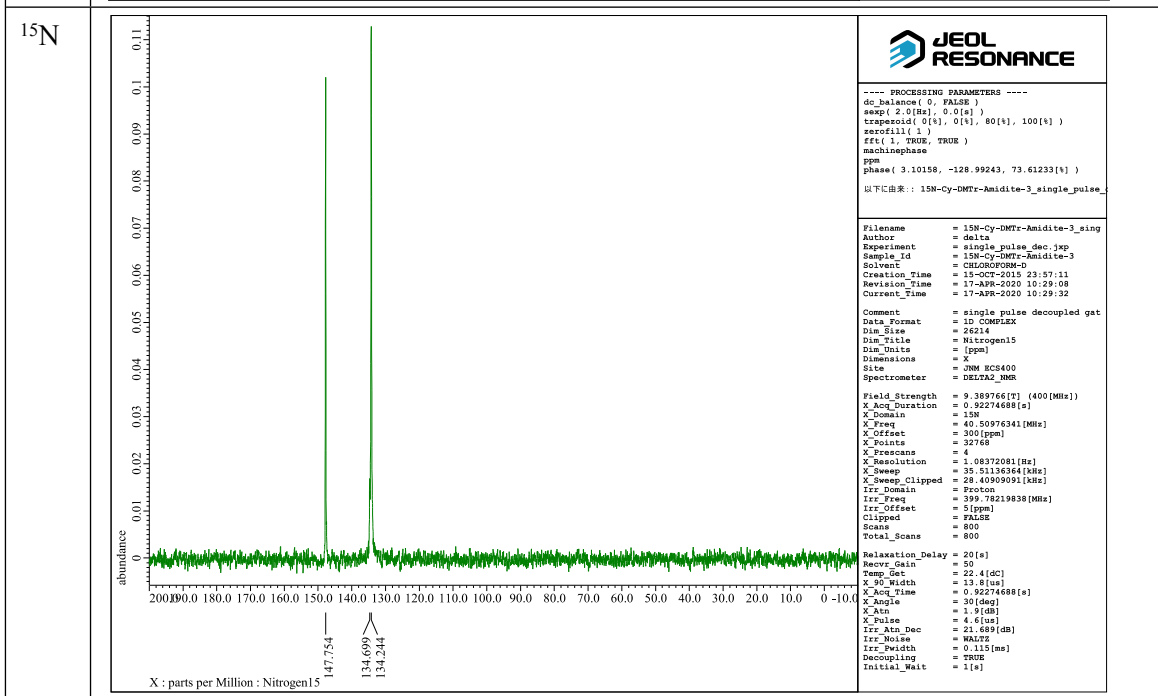

31P

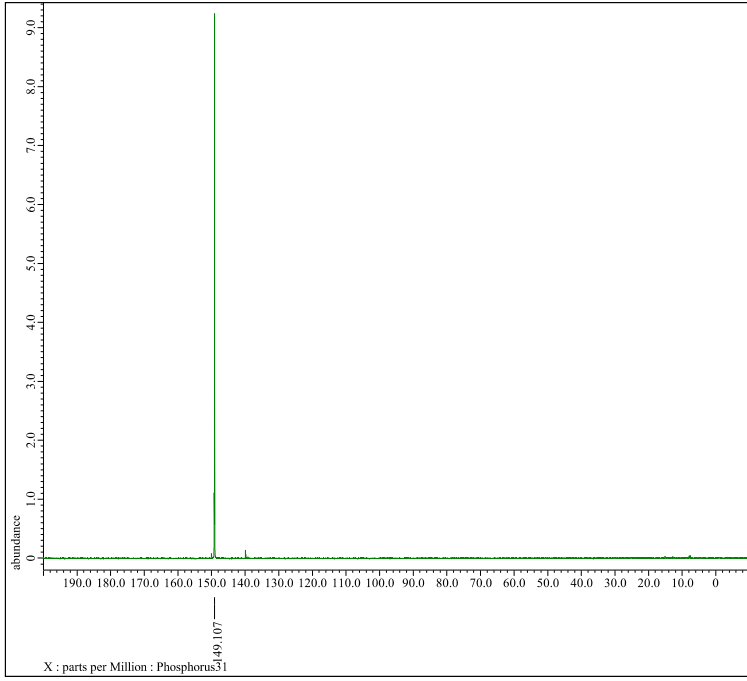

**JEOL RESONANCE**

---- PROCESSING PARAMETERS ----  
dc\_balance( 0, FALSE )  
sweep( 2.0[Hz], 0.0[s] )  
trapezoid( 0[%], 0[%], 80[%], 100[%] )  
zerofill( 1 )  
fft( 1, TRUE, TRUE )  
machinephase  
ppm  
phase( -0.1569, 0, 28.88643[Hz] )  
以下に由来: 15N-Cy-DMTr-Amidite-3\_single\_pulse\_...

Filename = 15N-Cy-DMTr-Amidite-3\_sing  
Author = delta  
Experiment = single\_pulse\_dec.jxp  
Sample\_Id = 15N-Cy-DMTr-Amidite-3  
Solvent = CH2Cl2/CDCl3  
Creation\_Time = 16-OCT-2015 04:39:38  
Revision\_Time = 17-APR-2020 10:31:22  
Current\_Time = 17-APR-2020 10:31:32  
Comment = single pulse decoupled gat  
Data\_Format = 1D COMPLEX  
Dim\_Size = 26214  
Dim\_Title = Phosphorus31  
Dim\_Units = [ppm]  
Dimensions = X  
Site = JNM ECP400  
Spectrometer = DELTA2\_NMR  
Field\_Strength = 9.389766[T] (400[MHz])  
X\_Acq\_Duration = 0[s]  
X\_Domain = 31P  
X\_Freq = 161.83469309[MHz]  
X\_Offset = 0[ppm]  
X\_Points = 32768  
X\_Prescans = 4  
X\_Resolution = 4.35965402[Hz]  
X\_Sweep = 142.85714286[kHz]  
X\_Sweep\_Clippped = 114.28571429[kHz]  
Irr\_Domain = Proton  
Irr\_Freq = 399.78219838[MHz]  
Irr\_Offset = 5[ppm]  
Clipped = FALSE  
Incomplete\_Copy = TRUE  
Scans = 325  
Total\_Scans = 325  
Relaxation\_Delay = 20[s]  
Recor\_Gain = 50  
Temp\_Get = 21.6[dc]  
X\_90\_Width = 13.91[us]  
X\_Acq\_Time = 0.229376[s]  
X\_Angle = 30[deg]  
X\_Pin = 2.9[dB]  
X\_Pulse = 4.6333333[us]  
Irr\_Abs\_Dec = 21.609[dB]  
Irr\_Noise = HALTZ  
Irr\_Width = 0.115[ms]  
Decoupling = TRUE

## S2. Circular Dichroism of duplex and triplex

Circular dichroism spectra were measured on a JASCO J-710 spectropolarimeter between 350 nm and 200 nm in standard buffer containing 1.0 M NaCl, 10 mM of MacIlvaine buffer (phosphate-citric acid, pH 5.8), at 15 °C. The duplexes and triplexes concentrations were 0.8  $\mu$ M (15  $\mu$ M/base pair). Spectra were acquired every 1 nm with a bandwidth setting of 1 nm at a speed of 50 nm/min, averaging over 5 scans.

Circular dichroism spectroscopy was used to study the macroscopic helical geometry of the duplex DNA. All CD spectra for DNAs indicated by table 2 were analyzed at 15 °C. The CD spectra of triplex were indicated the same trend for each CD of duplex.

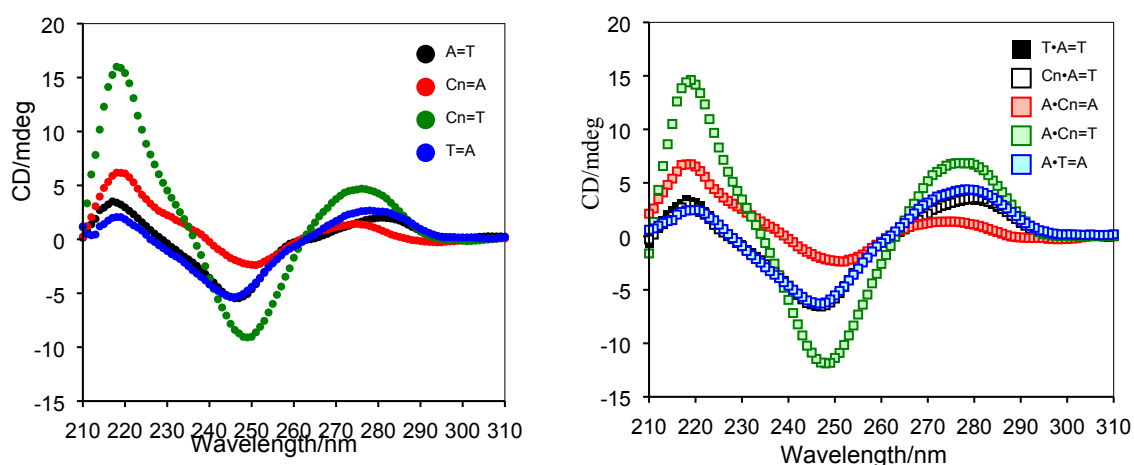

Circular dichroism of the sequences shown in Table 2 (in 10 mM McIlvaine buffer pH 5.8 and 1000 mM NaCl).
